# Supplementary material for: Cytotoxicity of Benzofuran-Containing Simplified Viniferin Analogues
Source: MDPI journal article supplement (doi:10.3390/ph17081012), 2024-08-01
Supplement: s1 [file s1]

# Cytotoxicity of benzofuran-containing simplified viniferin analogues

Salvatore Princiotto <sup>1,\*</sup>, Cecilia Pinna <sup>1</sup>, Luce Micaela Mattio <sup>1</sup>, Francesca Annunziata <sup>1</sup>, Giovanni Luca Beretta <sup>2</sup>, Andrea Pinto <sup>1</sup> and Sabrina Dallavalle <sup>1</sup>

<sup>1</sup>Department of Food, Environmental and Nutritional Sciences (DeFENS), University of Milan, Via Celoria 2, 20133, Milan, Italy; e-mail: cecilia.pinna@unimi.it (C.P.); luce.mattio@unimi.it (L.M.M.); francesca.annunziata@unimi.it (F.A.); andrea.pinto@unimi.it (A.P.); sabrina.dallavalle@unimi.it (S.D.)

<sup>2</sup>Molecular Pharmacology Unit, Department of Experimental Oncology, Fondazione IRCCS Istituto Nazionale Tumori, via Amadeo 42, 20133 Milan, Italy; email: giovanni.beretta@istitutotumori.mi.it (G.L.B.)

\*Correspondence: salvatore.princiotto@unimi.it

|                                                                           |         |
|---------------------------------------------------------------------------|---------|
| <b>Table S1.</b> Calculated physico-chemical properties                   | Page S2 |
| <b>Scheme S1-S3.</b> Synthesis of compounds <b>3-9</b>                    | Page S3 |
| <b>Scheme S4-S6.</b> Synthesis of compounds <b>10-13</b> and <b>15-17</b> | Page S4 |
| <b>Scheme S7.</b> Synthesis of compound <b>14</b>                         | Page S5 |

**Table S1.** Chemicalize was used for the calculation of the physico-chemical properties for all the tested compounds, March 2024, <https://chemicalize.com/>, developed by ChemAxon.

| compound  | Molar mass | cLogP | nHA | nHD | HLB  | TPSA   | VDW volume |
|-----------|------------|-------|-----|-----|------|--------|------------|
| <b>1</b>  | 228.08     | 3.40  | 3   | 3   | 8.66 | 60.69  | 204.56     |
| <b>2</b>  | 256.11     | 3.69  | 3   | 1   | 7.91 | 38.69  | 239.77     |
| <b>3</b>  | 454.14     | 5.96  | 6   | 5   | 9.36 | 110.38 | 394.53     |
| <b>4</b>  | 510.20     | 6.54  | 6   | 1   | 7.29 | 66.38  | 465.54     |
| <b>5</b>  | 454.48     | 5.96  | 6   | 5   | 9.36 | 110.38 | 394.32     |
| <b>6</b>  | 454.48     | 5.31  | 6   | 6   | 8.93 | 121.38 | 389.5      |
| <b>7</b>  | 452.46     | 6.17  | 5   | 5   | 8.81 | 130.41 | 387.01     |
| <b>8</b>  | 452.46     | 6.17  | 5   | 5   | 8.81 | 114.29 | 386.91     |
| <b>9</b>  | 318.33     | 4.44  | 3   | 3   | 7.45 | 73.83  | 272.54     |
| <b>10</b> | 360.37     | 4.91  | 4   | 4   | 8.89 | 94.06  | 307.92     |
| <b>11</b> | 344.37     | 5.13  | 3   | 3   | 7.21 | 73.83  | 299.59     |
| <b>12</b> | 334.33     | 4.13  | 4   | 4   | 9.14 | 94.06  | 281.19     |
| <b>13</b> | 360.36     | 4.91  | 4   | 4   | 8.89 | 94.06  | 307.96     |
| <b>14</b> | 344.37     | 5.13  | 3   | 3   | 7.21 | 73.83  | 299.36     |
| <b>15</b> | 372.42     | 5.42  | 3   | 1   | 6.30 | 51.83  | 334.71     |
| <b>16</b> | 386.45     | 5.57  | 3   | 0   | 5.83 | 40.83  | 352.03     |
| <b>17</b> | 390.44     | 4.72  | 4   | 0   | 7.17 | 50.06  | 351.54     |

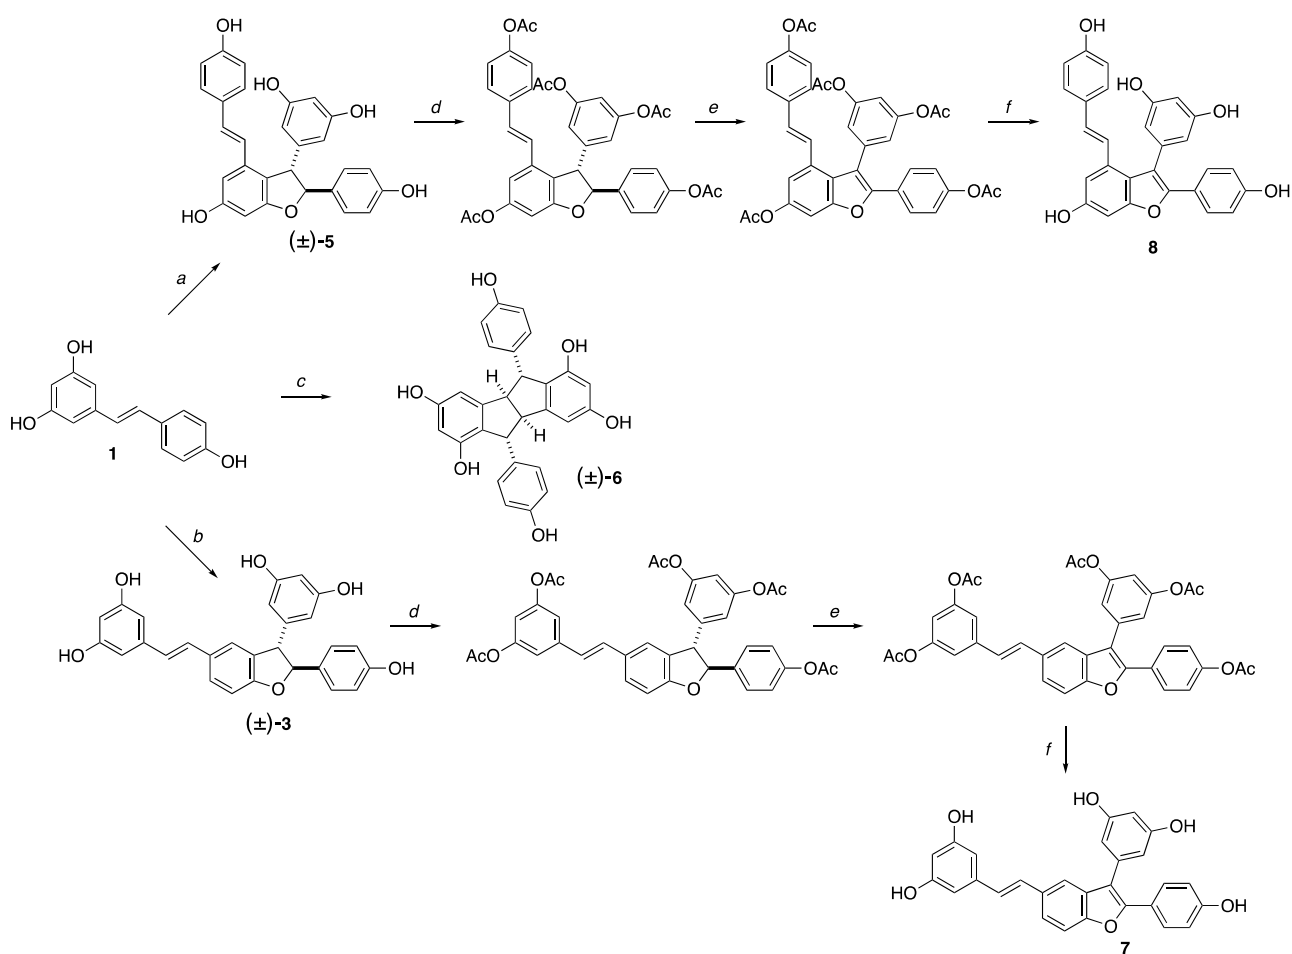

**Scheme S1.** Synthetic pathway for the obtention of **(±)-3**, **(±)-5**, **7** and **8**. *a.* FeCl<sub>3</sub>·6H<sub>2</sub>O, MeOH, rt, **15%**; *b.* i. HRP, 40 °C, acetone/citrate buffer pH 5 1:1; ii. H<sub>2</sub>O<sub>2</sub>, 40 °C, **49%** (over two steps); *c.* i. HRP, 40 °C, acetone/phosphate buffer pH 8 1:1; ii. H<sub>2</sub>O<sub>2</sub>, 40 °C, **21%** (over two steps); *d.* Ac<sub>2</sub>O, TEA, DCM/DMSO, rt, **90-92%**; *e.* DDQ, DCM, reflux, **60-84%**; *f.* KOH, MeOH, 0 °C, **55-70%**

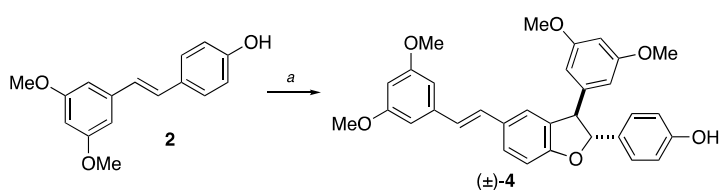

**Scheme S2.** Synthetic pathway for the obtention of **(±)-4**. *a.* i. HRP, 30 min, 40 °C, acetone/citrate buffer pH 5 1:1; ii. H<sub>2</sub>O<sub>2</sub>, 15 min, 40 °C, **60%** (over two steps)

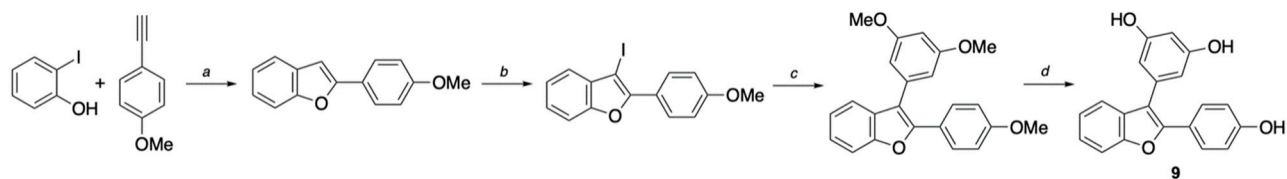

**Scheme S3.** Synthetic pathway for the obtention of **9**. *a.* CuI, PdCl<sub>2</sub>(PPh<sub>3</sub>)<sub>2</sub>, TEA, THF/MeCN, 100 °C, **50%**; *b.* NIS, PTSA, MeCN, rt, **74%**; *c.* 3,5-dimethoxyphenyl boronic acid, K<sub>2</sub>CO<sub>3</sub>, PdCl<sub>2</sub>(dppf), THF/H<sub>2</sub>O, 70 °C, **83%**; *d.* BBr<sub>3</sub>, DCM, 0 °C to rt, **61%**

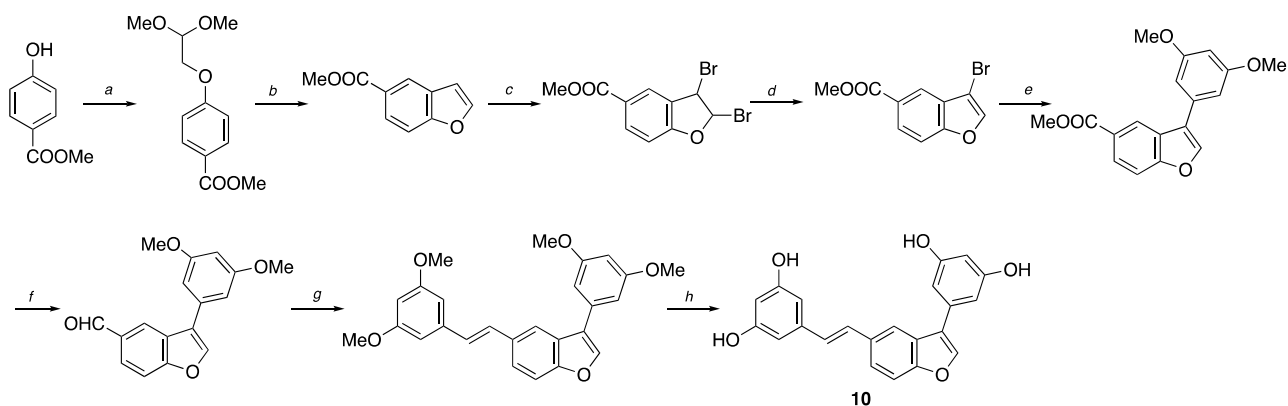

**Scheme S4.** Synthetic pathway for the obtention of **10**. *a*. 2-Br-1,1-DME, Cs<sub>2</sub>CO<sub>3</sub>, MeCN, reflux, **61%**; *b*. amberlyst-15, toluene, reflux, **51%**; *c*. Br<sub>2</sub>, DCM, 0 °C to rt, **82%**; *d*. KOH, MeOH/THF, 0 °C, **82%**; *e*. 3,5-dimethoxyphenylboronic acid, Pd(PPh<sub>3</sub>)<sub>4</sub>, Na<sub>2</sub>CO<sub>3</sub>, DME/H<sub>2</sub>O, 80 °C, **74%**; *f*. i. LiAlH<sub>4</sub>, THF, 0 °C, **97%**; ii. DMP, DCM, 0 °C to rt, **78%**; *g*. diethyl (3,5-dimethoxyphenyl)phosphonate, NaH, THF, MW, 120 °C, **80%**; *h*. BBr<sub>3</sub>, DCM, 0 °C to rt, **14%**

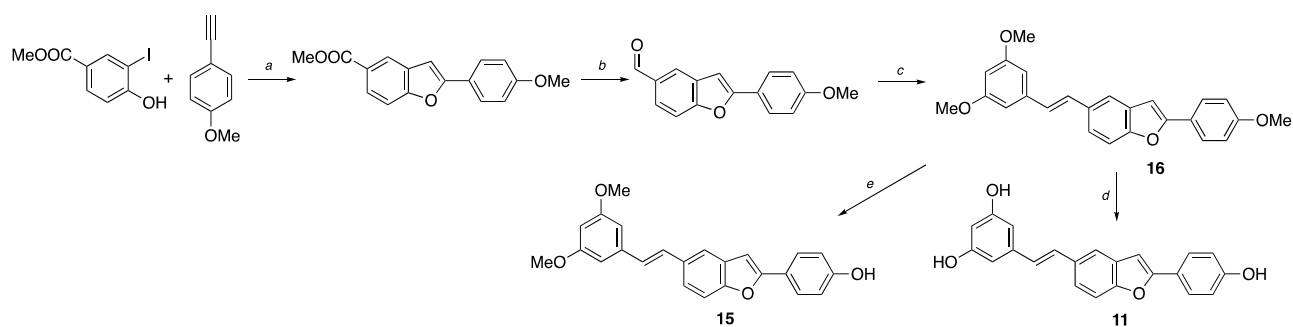

**Scheme S5.** Synthetic pathway for the obtention of **11**, **15** and **16**. *a*. CuI, PdCl<sub>2</sub>(PPh<sub>3</sub>)<sub>2</sub>, TEA, THF/MeCN, 100 °C, **62%**; *b*. LiAlH<sub>4</sub>, THF, 0 °C, **85%**; *c*. 3,5-dimethoxyphenyl phosphonate, NaH, THF, MW, 120 °C, **76%**; *d*. BBr<sub>3</sub>, DCM, 0 °C to rt, **60%**; *e*. BCl<sub>3</sub>, TBAI, DCM, 0 °C to rt, **35%**

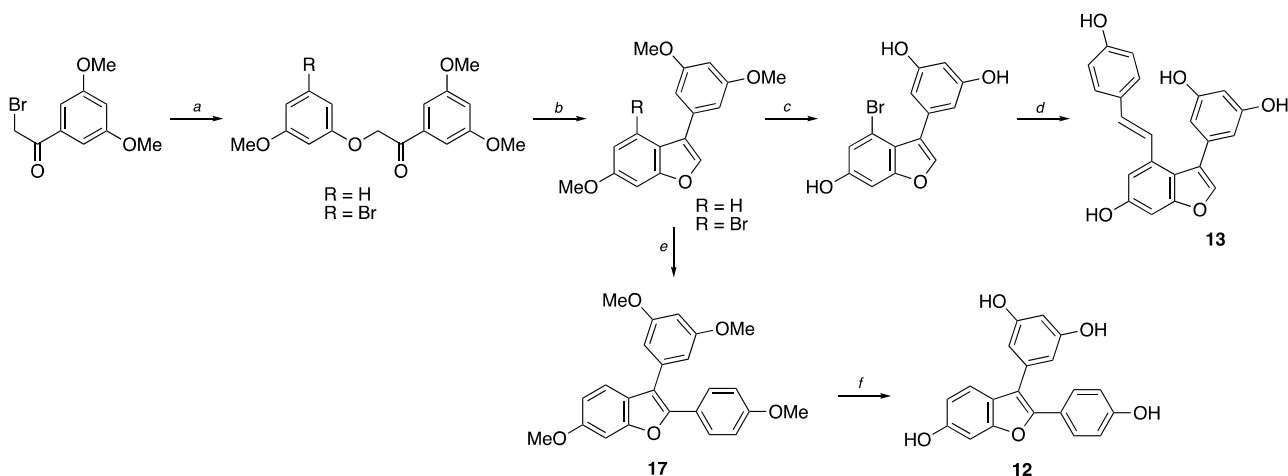

**Scheme S6.** Synthetic pathway for the obtention of **12**, **13** and **17**. *a*. 3-methoxyphenol (R = H) or 3-Br-5-methoxyphenol (R = Br), K<sub>2</sub>CO<sub>3</sub>, acetone, reflux, **90%** (R = H) or **89%** (R = Br); *b*. Bi(OTf)<sub>3</sub>, DCM, reflux, **43%** (R = H) or **83%** (R = Br); *c*. BBr<sub>3</sub>, DCM, -78 °C to rt, **91%**; *d*. *p*-Hydroxystyrene, Pd(OAc)<sub>2</sub>, TEA, dppp, DMF, 120 °C, **80%**; *e*. 4-Br anisole, Pd(OAc)<sub>2</sub>, PCy<sub>3</sub>HBF<sub>4</sub>, K<sub>2</sub>CO<sub>3</sub>, pivalic acid, DMA, 100 °C, **80%**; *f*. BBr<sub>3</sub>, DCM, -78 °C to rt, **52%**

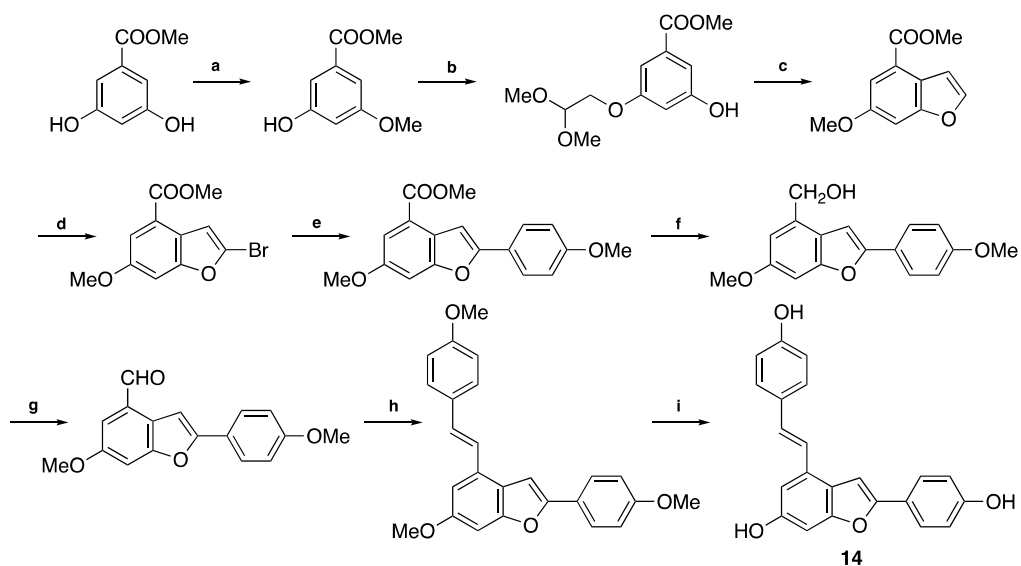

**Scheme S7.** Synthetic pathway for the obtainment of **14**. *a.* MeI, K<sub>2</sub>CO<sub>3</sub>, DMF, rt, **35%**; *b.* 2-Br-1,1-DME, Cs<sub>2</sub>CO<sub>3</sub>, MeCN, reflux, **67%**; *c.* amberlyst-15, PhCl, 120 °C, **63%**; *d.* NBS, 1,2-DCE/DMF, 70 °C, **80%**; *e.* 4-OMe-PBA, K<sub>2</sub>CO<sub>3</sub>, Pd(PPh<sub>3</sub>)<sub>4</sub>, 70 °C, **91%**; *f.* LiAlH<sub>4</sub>, THF, 0 °C, **89%**; *g.* DMP, DCM, **97%**; *h.* diethyl (4-OMe-Bn) phosphonate, NaH, MW, 120 °C, **54%**; *i.* BBr<sub>3</sub>, DCM, **24%**
